# Supplementary material for: Evaluation of BepanGel Hydrogel Efficacy and Tolerability Using an Abrasive Wound Model in a Within-Person, Single-Center, Randomized, Investigator-Blind Clinical Investigation
Source: Springer Nature journal article supplement (doi:10.1007/s13555-020-00432-5), 2020-08-02
Supplement: MOESM1 [file 18240458]

Table 1S: Tolerability assessments of test field treated with BepanGel wound care hydrogel or standard plaster alone

|  | Day 2 | | | | | Day 6 | | | | | Day 8 | | | | | Day 10 | | | | | Day 12 | | | | |
| --- | --- | --- | --- | --- | --- | --- | --- | --- | --- | --- | --- | --- | --- | --- | --- | --- | --- | --- | --- | --- | --- | --- | --- | --- | --- |
|  | BepanGel  + Plaster  (n =33) | | Plaster  (n =33) | | BepanGel + Plaster  (n =33) | | | Plaster  (n =33) | | BepanGel + Plaster  (n =33) | | | Plaster  (n =33) | | BepanGel + Plaster  (n =33) | | | Plaster  (n =33) | | BepanGel + Plaster  (n =33) | | | Plaster  (n =33) | | |
| Clinical tolerability by investigator | |  | |  | |  | | |  | |  | | |  | |  | | |  | |  | | |  | |
| No reaction | | 66.7% | 72.7% | | 93.9% | | | 97.0% | | 93.9% | | | 97.0% | | 100.0% | | | 100.0% | | 100.0% | | | 97.0% | |
| Slight uniform erythema | | 33.3% | 27.3% | | 6.1% | | | 3.0% | | 6.1% | | | 3.0% | | 0.0% | | | 0.0% | | 0.0% | | | 3.0% | |
| Global tolerability by subject | |  |  | |  | | |  | |  | | |  | |  | | |  | |  | | |  | |
| Very good | | 51.5% | 42.4% | | 48.5% | | | 42.4% | | 66.7% | | | 72.7% | | 84.8% | | | 69.7% | | 87.9% | | | 75.8% | |
| Good | | 24.2% | 36.4% | | 45.5% | | | 45.5% | | 27.3% | | | 15.2% | | 12.1% | | | 18.2% | | 12.1% | | | 18.2% | |
| Acceptable | | 15.2% | 15.2% | | 6.1% | | | 12.1% | | 6.1% | | | 12.1% | | 3.0% | | | 12.1% | | 0.0% | | | 6.1% | |
| Poor | | 9.1% | 3.0% | | 0.0% | | | 0.0% | | 0.0% | | | 0.0% | | 0.0% | | | 0.0% | | 0.0% | | | 0.0% | |
| Very poor | | 0.0% | 3.0% | | 0.0% | | | 0.0% | | 0.0% | | | 0.0% | | 0.0% | | | 0.0% | | 0.0% | | | 0.0% | |
| Global tolerability by investigator | |  |  | |  | | |  | |  | | |  | |  | | |  | |  | | |  | |
| Very good | | 90.9% | 90.9% | | 93.9% | | | 97.0% | | 93.9% | | | 97.0% | | 100% | | | 100% | | 100% | | | 97.0% | |
| Good | | 9.1% | 9.1% | | 6.1% | | | 3.0% | | 6.1% | | | 3.0% | | 0.0% | | | 0.0% | | 0.0% | | | 3.0% | |
